# Supplementary material
Source: PubMed Central journal article supplement (PMC5572659)
Supplement: NIHMS884809-supplement-ESI.pdf [file NIHMS884809-supplement-ESI.pdf]

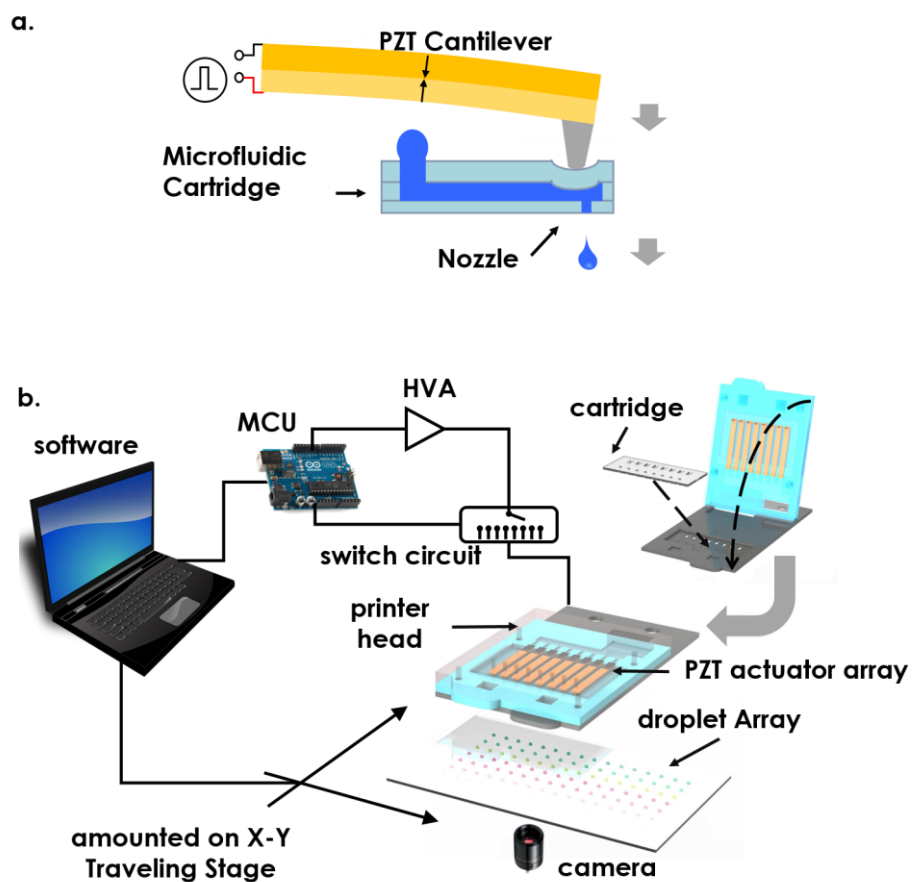

**Figure S1.** Photos of the system setup. a) Illustration of printing principles, where a piezoelectric cantilever strikes on a membrane, and liquid is squeezed out of the nozzle. b) Illustration of control system, and plug-and-play design of the cartridge holder.

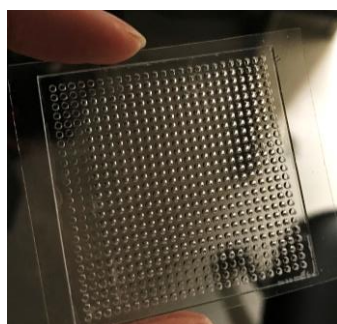

**Figure S2.**  $25 \times 25$  multi-well plate made from PMMA. Central part of the plates are filled with synthetic cell free systems covered by oil.

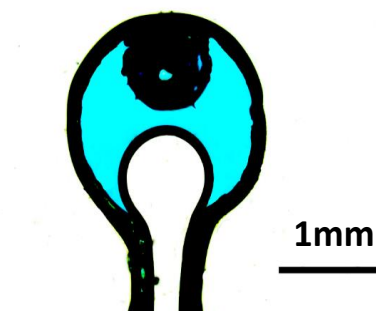

**Figure S3.** Real photo at the tip of a microfluidic channel in the cartridge, when liquid printing is finished. Only  $0.25\mu\text{L}$  liquid dead volume is left, shown as the blue region.
